# Supplementary material for: Fake news detection in Arabic media: comparative analysis of machine learning and deep learning algorithms using the Arabic Fake News Dataset
Source: PeerJ journal article supplement (doi:10.7717/peerj-cs.3272), 2025-10-30
Supplement: limitation.docx [file limitation.docx]

**Limitations**

We have some limitation in this study:

1. Arabic comprises Modern Standard Arabic (MSA) and other regional dialects. Machine learning models may have difficulties in generalizing across these variances.
2. Ambiguity: Arabic lexicon may possess multiple meanings contingent upon context, complicating precise detection of misinformation.
